# Supplementary material
Source: PubMed Central journal article supplement (PMC2174884)
Supplement: plntcell_tpc.107.053876_1.pdf [file plntcell_tpc.107.053876_1.pdf]

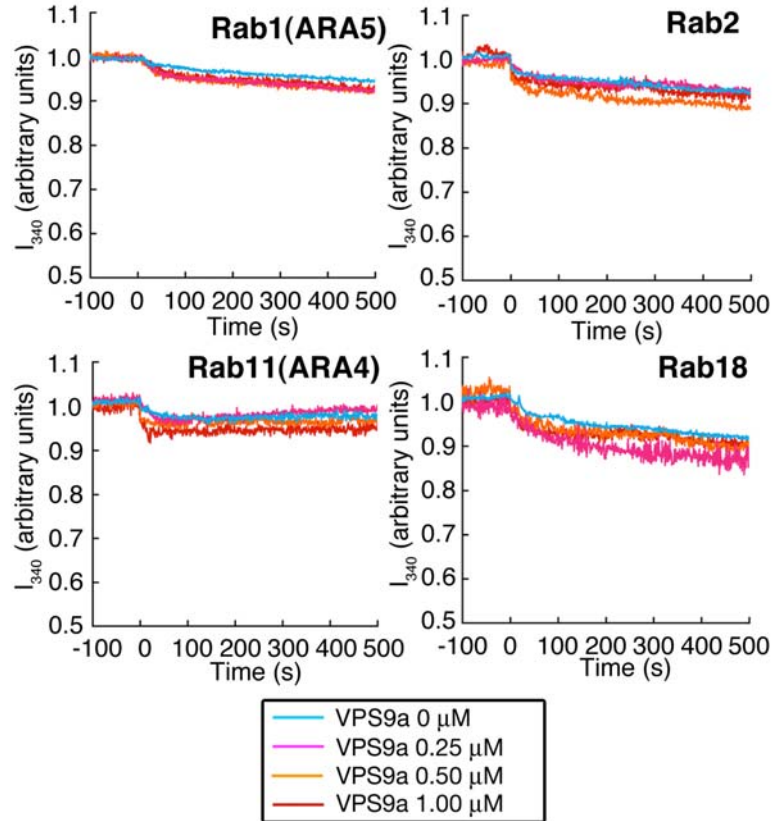

**Supplemental Figure 1.** VPS9a Does Not Activate Rab1, Rab2, Rab11 and Rab18 in Vitro.

The conformational changes of GST-fusions of Rab1 (ARA5), Rab2 (RAB2A), Rab11 (ARA4) and Rab18 (RAB18-1) upon GDP/GMP-PNP exchange were measured by monitoring the tryptophan autofluorescence in the absence (light blue) or presence of 0.25  $\mu\text{M}$  (pink), 0.5  $\mu\text{M}$  (orange), or 1  $\mu\text{M}$  (red) GST-VPS9a.

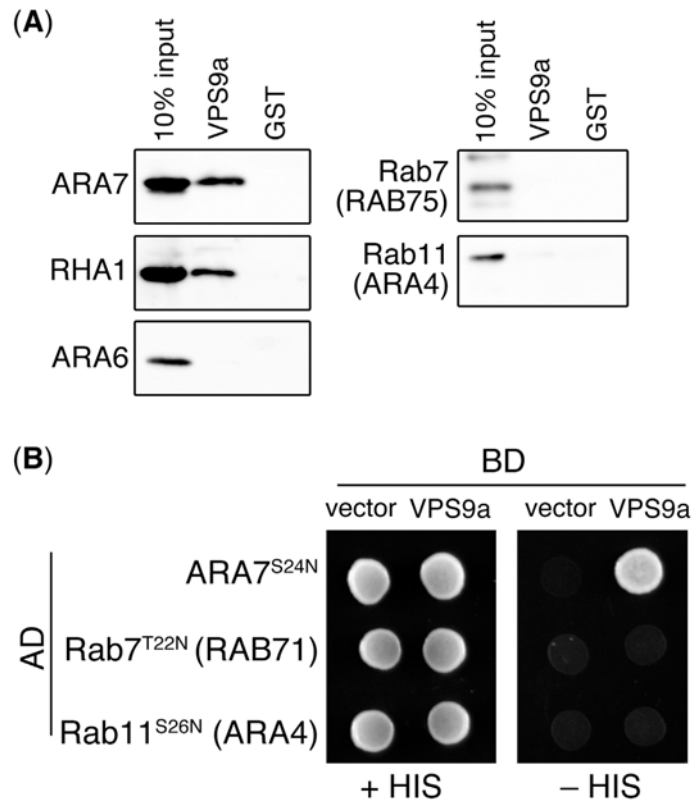

**Supplemental Figure 2.** VPS9a Does Not Interact with Rab7 and Rab11.

**(A)** Interactions between VPS9a and wild-type Rab GTPases detected by *in vitro* pull down assay.

Interactions were detected for conventional-type ARA7 and RHA1, but not for plant-unique ARA6 in this method. Rab7 (RAB75) and Rab11 (ARA4) showed no interaction with VPS9a. 10% input is also shown.

**(B)** VPS9a showed no interaction with either Rab7<sup>T22N</sup> or Rab11<sup>S26N</sup> in yeast two-hybrid assay.

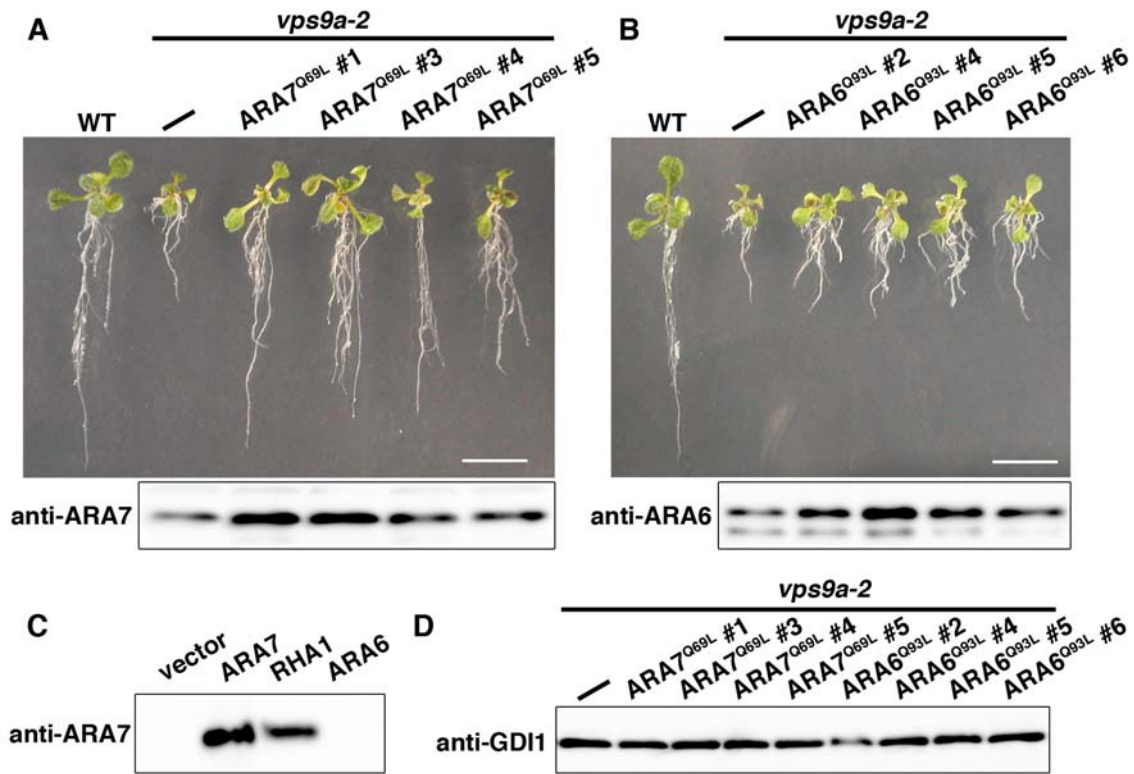

**Supplemental Figure 3.** Constitutive Active ARA7 (ARA7<sup>Q69L</sup>), but Not ARA6 (ARA6<sup>Q93L</sup>), Suppresses the *vps9a-2* Mutation.

(A) and (B) ARA7<sup>Q69L</sup> or ARA6<sup>Q93L</sup> was overexpressed in the *vps9a-2*. 12-day-old seedlings of *vps9a-2* and four individual transgenic lines expressing ARA7<sup>Q69L</sup> (A) or ARA6<sup>Q93L</sup> (B) were processed to the immunoblotting to compare the expression level of ARA7<sup>Q69L</sup> and ARA6<sup>Q93L</sup>. Although the expression level was equivalent between ARA7<sup>Q69L</sup> and ARA6<sup>Q93L</sup>, ARA6<sup>Q93L</sup> did not suppress the root phenotype of *vps9a-2*. ARA7<sup>Q69L</sup> #4 and ARA6<sup>Q93L</sup> #2 were shown in Figure 3 in the printed paper as representatives. Bars = 10 mm.

(C) Characterization of the antibody used for the detection of the conventional type of Rab5s. Lysates from yeast cells expressing ARA7, RHA1 or ARA6 were applied to the immunoblotting. This antibody was raised using GST-tagged ARA7 as an antigen, but it recognized both of ARA7 and RHA1.

(D) Amounts of GDI1 in *vps9a-2* and transgenic lines (loading control).

**switch I**

|                       | * :               | :             |
|-----------------------|-------------------|---------------|
| At5g45130_RHA1/RABF2a | KDQFVEFQESTIGAA   | FFSQTTLAVNDAT |
| At4g19640_ARA7/RABF2b | KDQFVEFQESTIGAA   | FFSQTTLAVNDAT |
| At3g54840_ARA6/RABF1  | RGQFDATSKVTVGAS   | FLSQTIALQDST  |
| At5g45750_RABA1c      | KNEFSLESKSTIGVEF  | ATR-SLNVDDK   |
| At4g18800_RABA1d      | RNEFSLESKSTIGVEF  | ATR-SLNVNEK   |
| At1g16920_RABA1b      | KNEFNLESKSTIGVEF  | ATR-TLKVDGK   |
| At1g06400_ARA2/RABA1a | KNEFNLESKSTIGVEF  | ATK-TTKVEGK   |
| At5g60860_RABA1f      | RNEFSLESKSTIGVEF  | ATR-SIHVDDK   |
| At3g15060_RABA1g      | RNEFSLESKSTIGVEF  | ATR-SIHVDEK   |
| At2g33870_RABA1h      | RNDFSHDSRSTIGVEF  | ATRRGIQVDDK   |
| At1g28550_RABA1i      | RNDFSHDSRATIGVEF  | ATR-SIQCDDK   |
| At4g18430_RABA1e      | RNEFSIESKSTIGVEF  | ATR-SVHVDEK   |
| At3g46830_RABA2c      | RNEFCLESKSTIGVEF  | ATR-TTQVEGK   |
| At5g59150_RABA2d      | RNEFCLESKSTIGVEF  | ATR-TLQVEGK   |
| At1g07410_RABA2b      | RNEFCLESKSTIGVEF  | ATR-TLQVEGK   |
| At1g09630_RABA2a      | RNEFCLESKSTIGVEF  | ATR-TLQVEGR   |
| At5g65270_RABA4a      | RDEFSLDSKATIGVEF  | QTR-TLVIDHK   |
| At4g39990_RABA4b      | RDEFSMDSKATIGVEF  | QTR-TLSIEEK   |
| At2g22390_RABA4e      | RDEFSMDSKATIRCF   | QYS-----      |
| At5g47960_RABA4c      | RNEFSIESKATIGVEF  | QTR-TLEIDRK   |
| At3g12160_RABA4d      | RNEFSVDSKATIGVEF  | QTK-TLVIDNK   |
| At1g01200_RABA3       | HNEFCYDSKSTIGVEF  | QTR-TITLRGK   |
| At2g31680_RABA5d      | RNEFNAHSKATIGVEF  | QTO-NMEIEGK   |
| At1g05810_ARA1/RABA5e | RNEFSANSKATIGVEF  | QTO-SMEIEGK   |
| At2g43130_ARA4/RABA5c | RNEFNPNKATIGVEF   | QTO-SMLIDGK   |
| At3g07410_RABA5b      | RDEFDTNSKATIGVEF  | QTO-LVEIEGK   |
| At5g47520_RABA5a      | RDEFYPNSKSTIGVEF  | QTO-KMDINGK   |
| At1g73640_RABA6a      | KDEFRLFDSKPTIGVEF | FAYR-NVHVGDK  |
| At1g18200_RABA6b      | RDEFRLDSKPTIGVDF  | FAYR-NVRVGDK  |
| At5g47200_RABD2b      | DDSYLDSYISTIGVDF  | KIR-TVEQDQK   |
| At4g17530_RABD2c      | DDSYLDSYISTIGVDF  | KIR-TVEQDQK   |
| At1g02130_ARA5/RABD2a | DDSYVESYISTIGVDF  | KIR-TVEQDQK   |
| At3g11730_RABD1       | DDAYIDSYISTIGVDF  | KIR-TIEQDQK   |
| At5g59840_RABE1b      | DGSFTTSFITTIGIDF  | KIR-TIELDGK   |
| At3g46060_ARA3/RABE1c | DGSFTTSFITTIGIDF  | KIR-TIELDGK   |
| At3g53610_RABE1a      | DGSFTTSFITTIGIDF  | KIR-TIELDGK   |
| At5g03520_RABE1d      | DDTFTTSFITTIGIDF  | KIR-TVELDQK   |
| At3g09900_RABE1e      | DDTFTTSFITTIGIDF  | KIR-TVELDQK   |
| At5g03530_RABC2a      | SSSVED-LAPTIGVDF  | KIK-QLTVGGK   |
| At3g09910_RABC2b      | SSSVED-LAPTIGVDF  | KIK-QMKVRGK   |
| At1g43890_RABC1       | SNTFDD-LSPTIGVDF  | KVK-YLTIGEK   |
| At4g35860_RABB1b      | DKRFQPVHDLTIGVEF  | GAR-MVTVDGR   |
| At4g17170_RABB1c      | DKRFQPVHDLTIGVEF  | GAR-MITIDNK   |
| At4g17160_RABB1a      | DKRFQAVHDLTIGVEF  | GAK-TITIDNK   |
| At4g09720_RABG3a      | HKKFSMQYKATIGADF  | VTK-ELQIGEK   |
| At1g22740_RABG3b      | NNKFSQQYKATIGADF  | VTK-ELQIDDR   |
| At2g21880_RABG2       | YKKFNKQYKATIGADF  | VTK-ELHIDEK   |
| At3g16100_RABG3c      | NRKFSNQYKATIGADF  | FLTK-EVQIDDR  |
| At1g52280_RABG3d      | NRKFSNQYKATIGADF  | FLTK-EVQIDDR  |
| At1g49300_RABG3e      | NKKFSNQYKATIGADF  | FLTK-EVQFEDR  |
| At3g18820_RABG3f      | NKKFSNQYKATIGADF  | FLTK-EVQFEDR  |
| At5g39620_RABG1       | DKDFKQLHNSTIYVDL  | VTK-EICIAER   |
| At2g44610_RABH1b      | YDKFDNTYQATIGIDF  | LSK-TMYLEDR   |
| At5g10260_RABH1e      | YDKFDNTYQATIGIDF  | LSK-TMYLEDR   |
| At4g39890_RABH1c      | YDKFDNTYQPTIGIDF  | LSK-TMYLEDR   |
| At2g22290_RABH1d      | YDKFDNTYQATIGIDF  | LSK-TMYLEDR   |
| At5g64990_RABH1a      | YGKFDTSYQATIGIDF  | LSK-TTRYEDR   |

**Supplemental Figure 4.** The Alignment of the Switch I Region of Plant Rab GTPases.

The Phe in the switch I region (orange) are conserved throughout the *Arabidopsis* Rab members. Only Rab5 members (ARA7, RHA1 and ARA6) have a small nonacidic residue (Ala/Ser, red) preceding the invariant Phe, while other Rab members have an acidic residue at this position (Asp/Glu, green).
